# Supplementary material for: Adaptive genetic potential and plasticity of trait variation in the foundation prairie grass Andropogon gerardii across the US Great Plains’ climate gradient: Implications for climate change and restoration
Source: PubMed Central journal article supplement (PMC7513703; doi:10.1111/eva.13028), 2020-06-22
Supplement: EVA-13-2333-s002.pdf [file EVA-13-2333-s002.pdf]

|                                     | Ecotype | Western Kansas      | Central Kansas          | Eastern Kansas          | Southern Illinois       |
|-------------------------------------|---------|---------------------|-------------------------|-------------------------|-------------------------|
| Emergence (units) 2010              | Dry     | 12.1817 ± 1.1169    | <b>4.9455 ± 0.5306</b>  | 4.1009 ± 0.4573         | 0.6913 ± 0.1437         |
|                                     | Mesic   | 11.9116 ± 1.1679    | 6.1284 ± 0.6271         | <b>4.2081 ± 0.4766</b>  | 0.6732 ± 0.14           |
|                                     | Wet     | 12.2145 ± 1.0912    | 5.0276 ± 0.5322         | 4.1392 ± 0.4561         | <b>0.1498 ± 0.06224</b> |
| Canopy (cm <sup>2</sup> ) 2010      | Dry     | 81.57 ± 15.7679     | <b>235.54 ± 44.9974</b> | 411.4 ± 78.1480         | 2031.76 ± 385.95        |
|                                     | Mesic   | 195.93 ± 41.3724    | 314.95 ± 59.6531        | <b>614.58 ± 118.148</b> | 2785.08 ± 529.05        |
|                                     | Wet     | 140.2 ± 26.9490     | 314.03 ± 59.6531        | 1181.66 ± 224.47        | <b>5479.18 ± 1040.8</b> |
| Canopy (cm <sup>2</sup> ) 2014      | Dry     | 2393.83 ± 649.52    | <b>2953.63 ± 634.6</b>  | 2490.33 ± 640.44        | 5437.11 ± 664.7         |
|                                     | Mesic   | 2162.06 ± 709.71    | 2283.75 ± 652.19        | <b>2341.46 ± 647.35</b> | 5363.91 ± 652.12        |
|                                     | Wet     | 3376.03 ± 647.33    | 4889.11 ± 652.11        | 5099.52 ± 642.88        | <b>13775 ± 652.11</b>   |
| Diameter (cm) 2010                  | Dry     | 24.3974 ± 2.7323    | <b>36.4123 ± 2.8323</b> | 48.1352 ± 3.4505        | 87.5931 ± 3.6794        |
|                                     | Mesic   | 38.1319 ± 2.9733    | 44.4393 ± 2.8325        | <b>60.3327 ± 3.5115</b> | 102.30 ± 3.6786         |
|                                     | Wet     | 35.1818 ± 2.6848    | 50.4293 ± 2.7820        | 80.2354 ± 3.3977        | <b>126.76 ± 3.6285</b>  |
| Diameter (cm) 2014                  | Dry     | 75.2644 ± 3.5022    | <b>78.6601 ± 3.4727</b> | 77.0613 ± 3.444         | 98.1805 ± 3.7798        |
|                                     | Mesic   | 74.4843 ± 3.9772    | 74.0586 ± 3.5592        | <b>78.9596 ± 3.5917</b> | 99.856 ± 3.7289         |
|                                     | Wet     | 83.5922 ± 3.5037    | 95.6035 ± 3.5397        | 103.88 ± 3.4747         | <b>143.37 ± 3.6014</b>  |
| Blade Width (mm) 2010               | Dry     | 8.2821 ± 0.4661     | <b>9.4908 ± 0.4607</b>  | 11.25 ± 0.458           | 13.75 ± 0.6169          |
|                                     | Mesic   | 7.3248 ± 0.5099     | 8.306 ± 0.4607          | <b>10.4016 ± 0.4636</b> | 12.8 ± 0.6169           |
|                                     | Wet     | 8.3354 ± 0.4635     | 9.95 ± 0.458            | 11.9 ± 0.458            | <b>15.575 ± 0.6169</b>  |
| Height (cm) 2010                    | Dry     | 14.301 ± 0.8569     | <b>23.387 ± 1.3809</b>  | 32.577 ± 1.9097         | 78.399 ± 4.5961         |
|                                     | Mesic   | 24.078 ± 1.5976     | 32.284 ± 1.9064         | <b>48.434 ± 2.8822</b>  | 82.487 ± 4.8359         |
|                                     | Wet     | 24.312 ± 1.4467     | 37.074 ± 2.1735         | 65.175 ± 3.8209         | <b>110.283 ± 6.4654</b> |
| Height (cm) 2014                    | Dry     | 56.8105 ± 2.8852    | <b>62.5429 ± 2.8264</b> | 68.725 ± 2.7721         | 103.43 ± 3.0608         |
|                                     | Mesic   | 65.7187 ± 3.2185    | 64.7111 ± 2.7989        | <b>75.8707 ± 2.8272</b> | 110.53 ± 2.9517         |
|                                     | Wet     | 79.066 ± 2.8571     | 87.3967 ± 2.8279        | 87.6125 ± 2.7721        | <b>140.03 ± 2.8866</b>  |
| Vegetative Biomass (g per plant)    | Dry     | 223.98 ± 56.48      | <b>388.94 ± 55.63</b>   | 224.53 ± 55.24          | 418.37 ± 56.04          |
|                                     | Mesic   | 218.27 ± 61.33      | 308.12 ± 55.24          | <b>308.68 ± 56.94</b>   | 530.84 ± 55.63          |
|                                     | Wet     | 263.16 ± 57.03      | 432.72 ± 55.65          | 567.14 ± 55.24          | <b>1124.94 ± 55.23</b>  |
| Reproductive Biomass (g per plant)  | Dry     | 18.5807 ± 15.0391   | <b>102.97 ± 14.6761</b> | 78.4569 ± 14.505        | 49.8466 ± 14.853        |
|                                     | Mesic   | 7.5699 ± 16.6620    | 34.0776 ± 14.505        | <b>67.3245 ± 15.238</b> | 66.5200 ± 14.676        |
|                                     | Wet     | 1.0163 ± 15.2386    | 58.5502 ± 14.678        | 134.54 ± 14.5051        | <b>307.73 ± 14.5051</b> |
| Probability of Anthesis 2012        | Dry     | 0.3784 ± 0.07973    | <b>0.8158 ± 0.06289</b> | 0.9487 ± 0.03532        | 0.9737 ± 0.02597        |
|                                     | Mesic   | 0.03333 ± 0.03277   | 0.2632 ± 0.07143        | <b>0.8919 ± 0.05105</b> | 0.7838 ± 0.06768        |
|                                     | Wet     | 0.05263 ± 0.03622   | 0.7895 ± 0.06613        | 0.9250 ± 0.04165        | <b>0.9250 ± 0.04165</b> |
| Days to Anthesis Julian days 2012   | Dry     | 155.62 ± 4.8113     | <b>161.87 ± 7.4362</b>  | 122.35 ± 4.6211         | 103.89 ± 5.3609         |
|                                     | Mesic   | -                   | 180.00 ± 12.8923        | <b>147.01 ± 4.7781</b>  | 131.16 ± 5.7908         |
|                                     | Wet     | -                   | 195.22 ± 13.0580        | 143.88 ± 4.6222         | <b>132.54 ± 5.3620</b>  |
| Probability of Seed Production 2012 | Dry     | 0.3580 ± 0.07934    | <b>0.6579 ± 0.09646</b> | 0.9264 ± 0.04467        | 0.8713 ± 0.06134        |
|                                     | Mesic   | 8.117E-9 ± 0.000017 | 0.1485 ± 0.06487        | <b>0.8703 ± 0.06161</b> | 0.7380 ± 0.08700        |
|                                     | Wet     | 7.725E-9 ± 0.000014 | 0.1463 ± 0.06566        | 0.9068 ± 0.05035        | <b>0.9296 ± 0.04340</b> |
| Seed Production (g per plant) 2012  | Dry     | 1.1704 ± 0.5601     | <b>1.2018 ± 0.4397</b>  | 4.2709 ± 1.3739         | 4.3822 ± 1.4588         |
|                                     | Mesic   | -                   | 0.3467 ± 0.2648         | <b>2.1576 ± 0.7191</b>  | 2.7106 ± 0.9565         |
|                                     | Wet     | -                   | 0.2481 ± 0.1982         | 7.3587 ± 2.3897         | <b>14.0057 ± 4.5491</b> |

S Table 1. Estimated least square means and corresponding SE of vegetative, biomass, and reproductive response variables by ecotype for each planting site. Note: Home site in bold italics

| Variable                              | Site                       |               | Ecotype                 |               | Site x Ecotype            |               | Time                        |         | Site x Time               |         | Ecotype x Time            |         | Site x Ecotype x Time    |                |
|---------------------------------------|----------------------------|---------------|-------------------------|---------------|---------------------------|---------------|-----------------------------|---------|---------------------------|---------|---------------------------|---------|--------------------------|----------------|
|                                       | F <sub>Df n, Df d</sub>    | P             | F <sub>Df n, Df d</sub> | P             | F <sub>Df n, Df d</sub>   | P             | F <sub>Df n, Df d</sub>     | P       | F <sub>Df n, Df d</sub>   | P       | F <sub>Df n, Df d</sub>   | P       | F <sub>Df n, Df d</sub>  | P              |
| Canopy Area (2010, 2014)              | 213.33 <sub>3, 36.26</sub> | <0.0001       | 14.63 <sub>2, 9.1</sub> | <b>0.0015</b> | 5.33 <sub>6, 805.6</sub>  | <0.0001       | 1204.87 <sub>1, 795.2</sub> | <0.0001 | 90.44 <sub>3, 795.2</sub> | <0.0001 | 11.48 <sub>2, 795.2</sub> | <0.0001 | 1.50 <sub>6, 795.2</sub> | <b>0.01738</b> |
| Diameter (2010, 2014)                 | 270.35 <sub>3, 33.27</sub> | <0.0001       | 3.66 <sub>2, 8.95</sub> | 0.0688        | 4.96 <sub>6, 803.5</sub>  | <0.0001       | 426.70 <sub>1, 793.4</sub>  | <0.0001 | 36.65 <sub>3, 793.4</sub> | <0.0001 | 18.04 <sub>2, 793.4</sub> | <0.0001 | 4.38 <sub>6, 793.4</sub> | <b>0.0002</b>  |
| Height (2010, 2014)                   | 108.68 <sub>3, 37.53</sub> | <0.0001       | 24.00 <sub>2, 8.1</sub> | <b>0.0004</b> | 27.85 <sub>6, 801.1</sub> | <0.0001       | 108.68 <sub>1, 792.8</sub>  | <0.0001 | 12.31 <sub>3, 792.8</sub> | <0.0001 | 39.99 <sub>2, 792.8</sub> | <0.0001 | 5.04 <sub>6, 792.8</sub> | <0.0001        |
|                                       | Site                       |               | Ecotype                 |               | Site x Ecotype            |               |                             |         |                           |         |                           |         |                          |                |
| Emergence                             | 218.84 <sub>3, 28.73</sub> | <0.0001       | 3.80 <sub>2, 22.3</sub> | <b>0.0380</b> | 2.81 <sub>6, 439</sub>    | <b>0.0107</b> |                             |         |                           |         |                           |         |                          |                |
| Blade Width (2010)                    | 94.16 <sub>3, 37.1</sub>   | <0.0001       | 5.33 <sub>2, 10</sub>   | <b>0.0264</b> | 1.01 <sub>6, 331</sub>    | 0.4162        |                             |         |                           |         |                           |         |                          |                |
| Vegetative Biomass (2011)             | 13.31 <sub>2, 9</sub>      | <b>0.0020</b> | 62.86 <sub>3, 36</sub>  | <0.0001       | 16.01 <sub>6, 385</sub>   | <0.0001       |                             |         |                           |         |                           |         |                          |                |
| Reproductive Biomass (2011)           | 31.15 <sub>2, 9</sub>      | <0.001        | 36.70 <sub>3, 36</sub>  | <0.0001       | 27.61 <sub>6, 385</sub>   | <0.0001       |                             |         |                           |         |                           |         |                          |                |
| Probability of Anthesis (2012)        | 29.82 <sub>3, 27</sub>     | <0.0001       | 10.56 <sub>2, 9</sub>   | <b>0.0044</b> | 1.68 <sub>6, 27</sub>     | 0.1649        |                             |         |                           |         |                           |         |                          |                |
| Days to Anthesis (2012)               | 41.22 <sub>3, 27</sub>     | <0.0001       | 9.13 <sub>2, 17.6</sub> | <b>0.0019</b> | 0.47 <sub>4, 27</sub>     | 0.7543        |                             |         |                           |         |                           |         |                          |                |
| Probability of Seed Production (2012) | 42.17 <sub>2, 27</sub>     | <0.0001       | 3.10 <sub>2, 7.7</sub>  | 0.1028        | 3.07 <sub>4, 27</sub>     | <b>0.0330</b> |                             |         |                           |         |                           |         |                          |                |
| Seed Production (2012)                | 17.31 <sub>3, 44.57</sub>  | <0.0001       | 3.52 <sub>2, 13.6</sub> | 0.0587        | 3.53 <sub>4, 223.9</sub>  | <b>0.0081</b> |                             |         |                           |         |                           |         |                          |                |

S Table 2. Statistical analyses of response variables from 2010, 2011, 2012 and 2014. Factors include planting site (S), Ecotype (E), and S X E interactions. Upper table; Variables with multiple years of measurements (Canopy Area, Diameter, and Height). Lower table Variables with only one year of measurements (Blade width, Vegetative biomass, Reproductive biomass, Probability of anthesis, Days to anthesis, Probability of seed production, and Seed production). For variables measures across two years (2010 and 2014 for canopy area, diameter, and height) the full three-way interaction with Time (T) is provided.

|               | Dry Ecotype | Mesic Ecotype | Wet Ecotype |
|---------------|-------------|---------------|-------------|
| Dry Ecotype   | 33 (31.1%)  | 1 (0.9%)      | 0           |
| Mesic Ecotype | 5 (4.7%)    | 30 (28.3%)    | 0           |
| Wet Ecotype   | 0           | 0             | 37 (34.9%)  |

S Table 3. Table showing the classification rates of the 10-fold cross validation. Note that 94.3% are correctly assigned (data from along the diagonal). Total of 106 individuals analyzed with 34 dry, 35 mesic, and 37 wet ecotypes.

| Parameter Estimates Principle Coordinate 1 |    |           |                |         |         |
|--------------------------------------------|----|-----------|----------------|---------|---------|
| Parameter                                  | DF | Estimate  | Standard Error | t-value | p-value |
| Intercept                                  | 1  | -18.83779 | 2.902155       | -6.49   | 1.0000  |
| Annual Diurnal Variation                   | 1  | 1.614488  | 0.196429       | 8.22    | 0.0118  |
| Number of Precipitation Events > 1.25 cm   | 1  | -0.255112 | 0.025752       | -9.91   | 0.0010  |
| Seasonal Mean Precipitation                | 1  | 0.081677  | 0.021503       | 3.8     | <.0001  |
| Seasonal Mean Temperature                  | 1  | 0.404559  | 0.086862       | 4.66    | <.0001  |
| Seasonal Diurnal Variation                 | 1  | -0.6459   | 0.213481       | -3.03   | 0.0032  |

S Table 4. Final model obtained from stepwise regression depicting selected environmental conditions considered to be significantly associated with morphology PC score 1 for ecotypes grown in their home site

| Parameter Estimates Principal Coordinate 1 |    |            |                |         |         |
|--------------------------------------------|----|------------|----------------|---------|---------|
| Parameter                                  | DF | Estimate   | Standard Error | t-value | p-value |
| Intercept                                  | 1  | 8.569889   | 1.465610       | 5.85    | 1.0000  |
| Mean Annual Precipitation                  | 1  | -0.381848  | 0.022347       | -17.09  | <.0001  |
| Seasonal Mean Precipitation                | 1  | 0.496011   | 0.055912       | 8.87    | <.0001  |
| Parameter Estimates Principal Coordinate 2 |    |            |                |         |         |
| Parameter                                  | DF | Estimate   | Standard Error | t-value | p-value |
| Intercept                                  | 1  | -15.448569 | 3.852113       | -4.01   | 1.0000  |
| Annual Mean Temperature                    | 1  | -1.540529  | 0.435119       | -3.54   | 0.0005  |
| Mean Annual Precipitation                  | 1  | -0.231000  | 0.024784       | -9.32   | <.0001  |
| Number of Precipitation Events > 1.25 cm   | 1  | 1.035900   | 0.095066       | 10.90   | <.0001  |
| Seasonal Mean Temperature                  | 1  | 1.509246   | 0.240293       | 6.28    | <.0001  |

S Table 5. Final model obtained from stepwise regression depicting selected environmental conditions considered to be significantly associated with genetic distance principal coordinates 1 and 2 for ecotypes grown in their home site. Adjusted  $R^2$  PCo1 = 0.5593 and Adjusted  $R^2$  PCo2 = 0.3936.

| 12MI<br>(Wet) | DES<br>(Wet) | FUL<br>(Wet) | WAL<br>(Wet) | KON<br>(Mesic) | TAL<br>(Mesic) | TOW<br>(Mesic) | CAR<br>(Mesic) | CDB<br>(Dry) | REL<br>(Dry) | SAL<br>(Dry) | WEB<br>(Dry) |      |
|---------------|--------------|--------------|--------------|----------------|----------------|----------------|----------------|--------------|--------------|--------------|--------------|------|
| 0.000         |              |              |              |                |                |                |                |              |              |              |              | 12MI |
| 0.023         | 0.000        |              |              |                |                |                |                |              |              |              |              | DES  |
| 0.020         | 0.022        | 0.000        |              |                |                |                |                |              |              |              |              | FUL  |
| 0.018         | 0.021        | 0.020        | 0.000        |                |                |                |                |              |              |              |              | WAL  |
| 0.029         | 0.034        | 0.026        | 0.028        | 0.000          |                |                |                |              |              |              |              | KON  |
| 0.026         | 0.029        | 0.023        | 0.025        | 0.014          | 0.000          |                |                |              |              |              |              | TAL  |
| 0.032         | 0.035        | 0.028        | 0.030        | 0.011          | 0.014          | 0.000          |                |              |              |              |              | TOW  |
| 0.024         | 0.028        | 0.021        | 0.022        | 0.013          | 0.014          | 0.013          | 0.000          |              |              |              |              | CAR  |
| 0.033         | 0.035        | 0.029        | 0.032        | 0.012          | 0.017          | 0.012          | 0.014          | 0.000        |              |              |              | CDB  |
| 0.030         | 0.033        | 0.027        | 0.028        | 0.012          | 0.016          | 0.011          | 0.013          | 0.012        | 0.000        |              |              | REL  |
| 0.024         | 0.028        | 0.021        | 0.023        | 0.012          | 0.014          | 0.012          | 0.011          | 0.013        | 0.011        | 0.000        |              | SAL  |
| 0.033         | 0.037        | 0.029        | 0.033        | 0.012          | 0.016          | 0.011          | 0.014          | 0.011        | 0.012        | 0.013        | 0.000        | WEB  |

S Table 6. Pairwise  $F_{st}$  among pairs of populations.

Footnote: Pairwise  $F_{st}$  between ecotypes: Wet-Mesic = 0.0275, Standard Deviation = 0.004; Wet-Dry = 0.0297, Standard Deviation = 0.004; and Mesic-Dry = 0.013, Standard Deviation = 0.002.

| Analysis  | Markers  | Chr | Position | Gene Id       | Gene Information                                                                                                                                                                                                                                |
|-----------|----------|-----|----------|---------------|-------------------------------------------------------------------------------------------------------------------------------------------------------------------------------------------------------------------------------------------------|
| Bayescan  | TP3814   | 2   | 56601981 | Sb02g023140.1 | PF07732,PF00394,PF07731 PTHR11709 KOG1263 AT4G39830.1 L-ascorbate oxidase, putative                                                                                                                                                             |
| Bayescan  | TP23759  | 2   | 53236055 | Sb02g021490.1 | PF03055 PTHR10543 KOG1285 AT3G63520.1 CCD1 CCD1 (CAROTENOID CLEAVAGE DIOXYGENASE 1); 9-cis-epoxycarotenoid dioxygenase                                                                                                                          |
| Bayescan  | TP27974  | 6   | 39909469 | Sb06g014410.1 | PF02416 AT5G52440.1 HCF106 HCF106; proton motive force dependent protein transmembrane transporter                                                                                                                                              |
| Bayescan  | TP63759  | 1   | 55492323 | Sb01g032580.1 | PF03195 AT1G67100.1 LBD40 LBD40 (LOB DOMAIN-CONTAINING PROTEIN 40)                                                                                                                                                                              |
| Bayescan  | TP69704  | 10  | 42173347 | Sb10g019720.1 | PF02453 PTHR10994 KOG1792 AT4G11220.1 BTI2 BTI2 (VIRB2-INTERACTING PROTEIN 2)                                                                                                                                                                   |
| Bayescan  | TP70880  | 9   | 47608900 | Sb09g019060.1 | PF02182,PF05033,PF00856 PTHR22884 KOG1082 AT5G13960.1 SUVH4 SUVH4 (SU(VAR)3-9 HOMOLOG 4); double-stranded methylated DNA binding / histone methyltransferase(H3-K9 specific) / methyl-CpG binding / methyl-CpNpG binding / methyl-CpNpN binding |
| Bayescan  | TP79982  | 3   | 71975298 | Sb03g044630.1 | PF02362,PF06507 AT5G62000.1 ARF2 ARF2 (AUXIN RESPONSE FACTOR 2); protein binding / transcription factor                                                                                                                                         |
| Bayescan  | TP90370  | 3   | 6472172  | Sb03g006365.1 | PTHR23273 KOG0851 AT4G19130.1 DNA binding / nucleic acid binding / zinc ion binding                                                                                                                                                             |
| Bayescan  | TP100780 | 5   | 5098115  | Sb05g004185.1 | PF03140 AT3G44710.1 unknown protein                                                                                                                                                                                                             |
| Bayescan  | TP105473 | 2   | 77853480 | Sb02g044040.1 | PF02178,PF00855 AT3G05430.1 PWWP domain-containing protein                                                                                                                                                                                      |
| Bayescan  | TP110077 | 8   | 1046928  | Sb08g001115.1 | PF02493,PF01504 PTHR23086 KOG0229 2.7.1.68 K00889 AT3G07960.1 phosphatidylinositol-4-phosphate 5-kinase family protein                                                                                                                          |
| Bayescan  | TP119018 | 1   | 60290323 | Sb01g036670.1 | PF00046 PTHR19418 AT3G03660.1 WOX11 WOX11 (WUSCHEL related homeobox 11); DNA binding / transcription factor                                                                                                                                     |
| Bayescan  | TP150845 | 4   | 61081684 | Sb04g031080.1 | PF03169 PTHR22601 KOG2262 AT5G64410.1 OPT4 OPT4 (OLIGOPEPTIDE TRANSPORTER 4); oligopeptide transporter                                                                                                                                          |
| Bayescan  | TP152852 | 2   | 77115416 | Sb02g043300.1 | PF00046 PTHR19418:SF56 AT2G33880.1 HB-3 HB-3; transcription factor                                                                                                                                                                              |
| Consensus | TP97659  | 1   | 26916072 | Sb01g021990.1 | PF01397,PF03936 5.5.1.13 K04120 AT4G02780.1 GA1 GA1 (GA REQUIRING 1); ent-copalyl diphosphate synthase/ magnesium ion binding                                                                                                                   |
| Consensus | TP22546  | 3   | 10907551 | Sb03g010110.1 | PF00097 AT1G75400.1 protein binding / zinc ion binding                                                                                                                                                                                          |
| Consensus | TP48670  | 7   | 18950899 | Sb07g010450.1 | PF00141 1.11.1.7 K00430 AT4G16270.1 peroxidase 40 (PER40) (P40)                                                                                                                                                                                 |
| Consensus | TP14132  | 3   | 59665754 | Sb03g031310.1 | PF00310,PF04898,PF01645,PF01493,PF07992,PF00070 PTHR11938 KOG0399 1.4.1.13 K00265 AT5G53460.1 GLT1 GLT1; glutamate synthase (NADH)                                                                                                              |
| Bayenv2   | TP171997 | 7   | 11673324 | Sb07g007530.1 | PF01263 PTHR11122 KOG1594 AT5G57330.1 aldose 1-epimerase family protein                                                                                                                                                                         |
| Bayenv2   | TP4696   | 1   | 73079404 | Sb01g050120.1 | PTHR10343 AT3G52180.1 SEX4 SEX4 (STARCH-EXCESS 4); polysaccharide binding / protein tyrosine/serine/threonine phosphatase                                                                                                                       |
| Bayenv2   | TP103404 | 3   | 52366325 | Sb03g026040.1 | PF00160 PTHR11071 KOG0885 5.2.1.8 K01802 AT4G33060.1 peptidyl-prolyl cis-trans isomerase cyclophilin-type family protein                                                                                                                        |
| Bayenv2   | TP16994  | 9   | 51311839 | Sb09g021780.1 | PF02365 AT5G22380.1 anac090 anac090 (Arabidopsis NAC domain containing protein 90); transcription factor                                                                                                                                        |
| Bayenv2   | TP23740  | 2   | 67684318 | Sb02g033050.1 | AT5G42330.1 unknown protein                                                                                                                                                                                                                     |
| Bayenv2   | TP63473  | 4   | 57503730 | Sb04g027590.1 | PF00191 PTHR10502 KOG0819 AT5G10230.1 ANNAT7 ANNAT7 (ANNEXIN ARABIDOPSIS 7); calcium ion binding / calcium-dependent phospholipid binding                                                                                                       |
| Bayenv2   | TP107489 | 1   | 47278328 | Sb01g027420.1 | PF05770 AT4G33770.1 inositol 1,3,4-trisphosphate 5/6-kinase family protein                                                                                                                                                                      |
| Bayenv2   | TP68168  | 9   | 188110   | Sb09g000390.1 | PF00023,PF07719,PF00515 PTHR18958 KOG0548 AT3G04710.1 ankyrin repeat family protein                                                                                                                                                             |

S Table 7. Candidate gene annotations from Bayescan analysis (50), the top 1% of Bayenv2 outlier analysis (46), and the consensus markers (15) between the two analyses. Identification is from mapping big bluestem reads to the sorghum genome to find the position. Table shows identifies how the gene was found, using Bayenv or Bayescan or both (Analysis), big bluestem marker id (Markers), to which sorghum chromosome the marker maps (Chr) position on that chromosome (Position), gene identifier of the gene near the sorghum position (Gene Id), and the annotation information from that gene (Gene Information).

Footnote: Bayenv outliers lacking annotation included TP67155, TP505, TP125027, TP39152, TP168589, TP35977, TP61552, TP29318, TP119835, TP123355, TP69553, TP143151, TP171774, TP105122, TP147959, TP132908, TP103399, TP156046, TP168955, Both Bayenv and Bayescan TP1712, TP114252, TP118569, TP5219, TP62618, TP19463, TP52052, TP27663, TP104813, TP34353, TP47256; Bayescan TP24620, TP25391, TP27700, TP28582, TP38460, TP48595, TP49355, TP61449, TP77269, TP79145, TP91916, TP95678, TP97404, TP97704, TP129182, TP124284, TP144242, TP161527, TP164302, TP172967, TP173308

| Marker Number | SMP                    | MAT                     | SDV                    | SMT                    | MAP                    | ADV                    | TS                     | PPTDRI                 | NOPPT                  | MAP/MAT                |
|---------------|------------------------|-------------------------|------------------------|------------------------|------------------------|------------------------|------------------------|------------------------|------------------------|------------------------|
| 142           | -                      | -                       | 0.0010002              | -                      | -                      | -                      | -                      | -                      | -                      | -                      |
| 392           | -                      | -                       | 0.019604               | -                      | 0.017604               | 0.013203               | -                      | -                      | -                      | -                      |
| 429           | -                      | -                       | -                      | -                      | -                      | -                      | -                      | -                      | -                      | -                      |
| 478           | 0.005201               | -                       | 0.015403               | 0.014003               | -                      | -                      | -                      | -                      | -                      | -                      |
| 561           | -                      | -                       | 0.0056011              | -                      | -                      | -                      | -                      | -                      | -                      | -                      |
| 730           | 0.00040008             | -                       | 0.026605               | -                      | -                      | -                      | -                      | -                      | -                      | -                      |
| 752           | 0.0026005              | -                       | -                      | 0.010802               | -                      | -                      | -                      | -                      | -                      | -                      |
| 789           | 0.026205               | -                       | 0.005001               | 0.014403               | -                      | -                      | -                      | -                      | -                      | -                      |
| 919           | 0.014803               | -                       | -                      | -                      | -                      | -                      | -                      | -                      | -                      | -                      |
| 929           | 0.0018004              | -                       | -                      | 0.0054011              | 0.013003               | -                      | -                      | -                      | -                      | -                      |
| 969           | 0.00080016             | -                       | 0.0038008              | 0.016603               | 0.0030006              | 0.0044009              | 0.0044009              | 0.011602               | 0.0084017              | 0.0086017              |
| 999           | 0.00080016             | 0.00080016              | 0.0020004              | <b><u>0.027806</u></b> | 0.0066013              | 0.0086017              | 0.013603               | 0.016203               | 0.015803               | <b><u>0.021204</u></b> |
| 1124          | 0.00020004             | -                       | -                      | -                      | -                      | -                      | -                      | -                      | -                      | -                      |
| 1186          | -                      | -                       | 0.0026005              | -                      | 0.0018004              | 0.0040008              | 0.0012002              | 0.0016003              | <b><u>0.023405</u></b> | 0.011202               |
| 1219          | 0.0028006              | -                       | -                      | -                      | -                      | <b><u>0.021404</u></b> | -                      | -                      | -                      | -                      |
| 1227          | -                      | 0.00080016              | 0.021604               | 0.00040008             | 0.0020004              | -                      | 0.014203               | -                      | <b><u>0.023805</u></b> | 0.013603               |
| 1252          | 0.00020004             | -                       | -                      | 0.0028006              | 0.00080016             | 0.00020004             | 0.0012002              | 0.00080016             | 0.0018004              | 0.00060012             |
| 1272          | 0.0094019              | -                       | -                      | -                      | -                      | -                      | -                      | -                      | -                      | -                      |
| 1341          | 0.00040008             | 0.00080016              | 0.0012002              | 0.0030006              | 0.020604               | -                      | -                      | <b><u>0.020804</u></b> | -                      | -                      |
| 1573          | -                      | -                       | -                      | -                      | -                      | -                      | -                      | -                      | -                      | -                      |
| 1620          | 0.0024005              | -                       | 0.0022004              | -                      | 0.011602               | 0.0074015              | 0.0034007              | 0.010802               | -                      | -                      |
| 1764          | 0.012803               | -                       | -                      | -                      | -                      | -                      | -                      | -                      | -                      | -                      |
| 1781          | -                      | 0.00040008              | 0.011202               | 0.011202               | -                      | -                      | -                      | -                      | -                      | -                      |
| 1857          | <b><u>0.030206</u></b> | -                       | -                      | -                      | -                      | -                      | -                      | -                      | -                      | -                      |
| 2065          | 0.023605               | -                       | -                      | -                      | -                      | -                      | -                      | -                      | -                      | -                      |
| 2072          | 0.016003               | -                       | -                      | -                      | -                      | -                      | -                      | -                      | -                      | -                      |
| 2205          | 0.0072014              | -                       | -                      | 0.0026005              | <b><u>0.024805</u></b> | -                      | -                      | -                      | -                      | -                      |
| 2354          | -                      | -                       | -                      | -                      | -                      | -                      | -                      | -                      | -                      | -                      |
| 2438          | -                      | -                       | -                      | -                      | -                      | -                      | -                      | -                      | -                      | -                      |
| 2522          | -                      | -                       | 0.011802               | -                      | -                      | -                      | -                      | -                      | -                      | -                      |
| 2598          | -                      | -                       | -                      | -                      | -                      | -                      | -                      | -                      | -                      | -                      |
| 2754          | 0.010402               | -                       | 0.0022004              | -                      | -                      | -                      | -                      | -                      | -                      | -                      |
| 2788          | 0.014203               | -                       | 0.0060012              | 0.0060012              | -                      | -                      | -                      | -                      | -                      | -                      |
| 2792          | -                      | -                       | 0.012402               | -                      | -                      | -                      | -                      | -                      | -                      | -                      |
| 2912          | -                      | 0.00060012              | 0.00020004             | 0.013803               | -                      | -                      | 0.0030006              | 0.0036007              | 0.0012002              | 0.0024005              |
| 2921          | -                      | -                       | -                      | -                      | -                      | 0.00060012             | -                      | -                      | -                      | -                      |
| 3060          | 0.010802               | 0.0046009               | -                      | -                      | -                      | -                      | -                      | -                      | -                      | -                      |
| 3146          | -                      | -                       | -                      | -                      | -                      | -                      | -                      | -                      | -                      | -                      |
| 3167          | 0.0016003              | 0.0030006               | 0.021204               | 0.0074015              | 0.022204               | -                      | -                      | -                      | -                      | -                      |
| 3302          | -                      | -                       | -                      | 0.012402               | 0.00040008             | 0.0022004              | 0.0044009              | 0.0054011              | -                      | 0.012002               |
| 3305          | -                      | -                       | -                      | -                      | -                      | -                      | -                      | -                      | -                      | -                      |
| 3402          | 0.0036007              | -                       | -                      | 0.005201               | 0.015203               | -                      | -                      | -                      | -                      | -                      |
| 3435          | 0.0036007              | 0.00060012              | -                      | -                      | -                      | -                      | -                      | -                      | -                      | -                      |
| 3438          | 0.0074015              | -                       | -                      | 0.0022004              | -                      | -                      | -                      | -                      | 0.013403               | -                      |
| 3482          | 0.0012002              | 0.00020004              | <b><u>0.028606</u></b> | <b><u>0.025405</u></b> | 0.0076015              | -                      | -                      | -                      | -                      | -                      |
| 3514          | -                      | 0.0030006               | 0.0020004              | -                      | 0.00040008             | 0.0028006              | 0.00020004             | 0.0024005              | 0.0038008              | 0.0012002              |
| 3536          | 0.024405               | -                       | -                      | -                      | -                      | -                      | -                      | -                      | -                      | -                      |
| 3567          | -                      | 0.00020004              | -                      | -                      | 0.020804               | -                      | -                      | -                      | -                      | -                      |
| 3587          | -                      | 0.0024005               | 0.00060012             | 0.0028006              | 0.013403               | 0.004801               | 0.013603               | 0.018204               | -                      | -                      |
| 3781          | 0.0022004              | 0.0020004               | 0.022605               | -                      | 0.0034007              | -                      | 0.010002               | -                      | 0.0058012              | <b><u>0.013803</u></b> |
| 3806          | 0.00080016             | -                       | -                      | -                      | -                      | -                      | -                      | -                      | -                      | -                      |
| 3935          | 0.0020004              | 0.0026005               | -                      | -                      | -                      | -                      | -                      | -                      | -                      | -                      |
| 4008          | 0.0054011              | -                       | 0.025405               | -                      | <b><u>0.023805</u></b> | -                      | -                      | -                      | -                      | -                      |
| 4057          | 0.00080016             | -                       | 0.0034007              | 0.010802               | -                      | -                      | -                      | 0.016203               | -                      | -                      |
| 4189          | 0.0038008              | -                       | -                      | 0.00060012             | -                      | -                      | -                      | -                      | -                      | -                      |
| 4268          | -                      | 0.0022004               | 0.0090018              | 0.0014003              | 0.013803               | 0.004801               | <b><u>0.016203</u></b> | <b><u>0.021604</u></b> | -                      | -                      |
| 4349          | 0.0062012              | <b><u>0.014803</u></b>  | -                      | 0.0014003              | -                      | -                      | -                      | -                      | -                      | -                      |
| 4371          | 0.0018004              | <b><u>0.0056011</u></b> | 0.024205               | 0.00020004             | -                      | <b><u>0.022204</u></b> | -                      | -                      | -                      | -                      |
| 4451          | 0.00040008             | 0.00040008              | -                      | 0.0032006              | -                      | -                      | -                      | -                      | -                      | -                      |
| 4464          | -                      | -                       | -                      | -                      | -                      | -                      | -                      | -                      | -                      | -                      |
| 4470          | 0.0020004              | 0.0024005               | <b><u>0.028006</u></b> | -                      | 0.0062012              | -                      | 0.012402               | -                      | 0.0068014              | -                      |
| 4513          | 0.0040008              | -                       | 0.00040008             | -                      | -                      | 0.011402               | 0.014003               | 0.0046009              | -                      | -                      |
| 4560          | 0.019404               | -                       | -                      | -                      | -                      | 0.016603               | <b><u>0.019604</u></b> | 0.011202               | -                      | -                      |
| 4573          | <b><u>0.030206</u></b> | -                       | -                      | -                      | -                      | -                      | -                      | -                      | -                      | -                      |

S Table 8. *Bayscenv* climate association with SNPs and 11 climate variables. For each environmental variable (column), the most strongly associated SNP is indicated with bold italics and underlined, and the second strongest association is indicated with only bold. Only significant associations between outliers and environmental variables are presented here ( $q$ -value < 0.05), values indicate estimates of the strength of selection for a given loci with each climate variable (dashes indicate nonsignificant associations).



| <b>Variation explained</b>    | <b>Model 1 (Full)</b><br>Joint Effect of<br>Geography and<br>Climate | <b>Model 2</b><br>Climate<br>Conditioned by<br>Geography | <b>Model 3</b><br>Geography<br>conditioned by<br>Climate |
|-------------------------------|----------------------------------------------------------------------|----------------------------------------------------------|----------------------------------------------------------|
| Constrained (total explained) | 863                                                                  | 642 (74%)                                                | 129 (15%)                                                |
| Total joint explained         | 771 (89%)                                                            |                                                          |                                                          |
| Total unexplained             | 92 (11%)                                                             |                                                          |                                                          |
| Total variation               | 18710                                                                | 18710                                                    | 18710                                                    |

STable 9. RDA results for 9 climate variables (Elevation, Mean Annual Precipitation, Seasonal Mean Precipitation, Annual Diurnal Variation, Seasonal Diurnal Variation, Mean Annual Temperature, Temperature Severity Index, and Mean Annual Precipitation/Mean Annual Temperature) and geographic distance (Latitude and Longitude). Table shows the partitioning of variation between the full RDA (model 1) including the joint effects of both geography and climate, the partial RDA model 2 including the effects of climate conditioned by geography and the partial RDA model 3 including the effects of geography conditioned by climate.

|                                                       | <b>RDA1</b> | <b>RDA2</b> |
|-------------------------------------------------------|-------------|-------------|
| Latitude                                              | 0.7916      | 0.17256     |
| Longitude                                             | -0.7863     | -0.57245    |
| Mean Annual Precipitation                             | -0.7788     | -0.52479    |
| Mean Annual Precipitation/<br>Mean Annual Temperature | -0.7609     | -0.54181    |
| Elevation                                             | 0.7464      | 0.54051     |
| Temperature Severity Index                            | 0.7         | 0.60288     |
| Mean Annual Temperature                               | -0.5581     | -0.42841    |
| Annual Diurnal Variation                              | 0.593       | 0.70931     |
| Seasonal Diurnal Variation                            | 0.4848      | 0.61572     |
| Mean Seasonal Precipitation                           | -0.433      | -0.49167    |
| Mean Seasonal Precipitation                           | -0.2179     | -0.07754    |

S Table 10. Geographic and climate loading scores for RDA1 and RDA2 for the pRDA model including the joint effect of geography and climate. Precipitation of the driest year and number of precipitation events was excluded due to collinearity.

| Variable    | Markers  | Chromosome # | Position | Gene Id       | Gene Information                                                                                                                                                                                                                                |
|-------------|----------|--------------|----------|---------------|-------------------------------------------------------------------------------------------------------------------------------------------------------------------------------------------------------------------------------------------------|
| Height      | TP14132  | Chromosome_3 | 59665754 | Sb03g031310.1 | PF00310,PF04898,PF01645,PF01493,PF07992,PF00070 PTHR11938 KOG0399 1.4.1.13 K00265 AT5G53460.1 GLT1 GLT1; glutamate synthase (NADH)                                                                                                              |
| Height      | TP152852 | Chromosome_2 | 77115416 | Sb02g043300.1 | PF00046 PTHR19418:SF56 AT2G33880.1 HB-3 HB-3; transcription factor                                                                                                                                                                              |
| Height      | TP22546  | Chromosome_3 | 10907551 | Sb03g031310.1 | PF00097 AT1G75400.1 protein binding / zinc ion binding                                                                                                                                                                                          |
| Height      | TP48670  | Chromosome_7 | 18950899 | Sb07g010450.1 | PF00141 1.11.1.7 K00430 AT4G16270.1 peroxidase 40 (PER40) (P40)                                                                                                                                                                                 |
| Height      | TP70880  | Chromosome_9 | 47608900 | Sb09g019060.1 | PF02182,PF05033,PF00856 PTHR22884 KOG1082 AT5G13960.1 SUVH4 SUVH4 (SU(VAR)3-9 HOMOLOG 4); double-stranded methylated DNA binding / histone methyltransferase(H3-K9 specific) / methyl-CpG binding / methyl-CpNpG binding / methyl-CpNpN binding |
| Height      | TP97659  | Chromosome_1 | 26916072 | Sb01g021990.1 | PF01397,PF03936 5.5.1.13 K04120 AT4G02780.1 GA1 GA1 (GA REQUIRING 1); ent-copalyl diphosphate synthase/ magnesium ion binding                                                                                                                   |
| Canopy Area | TP63759  | Chromosome_1 | 55492323 | Sb01g032580.1 | PTHR10887 KOG1801 AT1G65810.1 tRNA-splicing endonuclease positive effector-related                                                                                                                                                              |
| Canopy Area | TP70880  | Chromosome_9 | 47608900 | Sb09g019060.1 | PF02182,PF05033,PF00856 PTHR22884 KOG1082 AT5G13960.1 SUVH4 SUVH4 (SU(VAR)3-9 HOMOLOG 4); double-stranded methylated DNA binding / histone methyltransferase(H3-K9 specific) / methyl-CpG binding / methyl-CpNpG binding / methyl-CpNpN binding |
| Emergence   | TP119018 | Chromosome_1 | 60290323 | Sb01g036670.1 | PF00046 PTHR19418 AT3G03660.1 WOX11 WOX11 (WUSCHEL related homeobox 11); DNA binding / transcription factor                                                                                                                                     |
| Emergence   | TP70880  | Chromosome_9 | 47608900 | Sb09g019060.1 | PF02182,PF05033,PF00856 PTHR22884 KOG1082 AT5G13960.1 SUVH4 SUVH4 (SU(VAR)3-9 HOMOLOG 4); double-stranded methylated DNA binding / histone methyltransferase(H3-K9 specific) / methyl-CpG binding / methyl-CpNpG binding / methyl-CpNpN binding |
| Blade Width | TP171997 | Chromosome_7 | 11673324 | Sb07g007530.1 | PF01263 PTHR11122 KOG1594 AT5G57330.1 aldose 1-epimerase family protein                                                                                                                                                                         |
| Blade Width | TP26923  | Chromosome_3 | 73373694 | Sb03g046210.1 | PF00036 PTHR10891 KOG0027 AT1G76640.1 calmodulin-related protein, putative                                                                                                                                                                      |
| Blade Width | TP124709 | Chromosome_6 | 58175486 | Sb06g029600.1 | PF01370 PTHR10366 KOG1502 1.3.1.77 K08695 AT1G61720.1 BAN BAN (BANYULS); oxidoreductase                                                                                                                                                         |
| Diameter    | TP144464 | Chromosome_6 | 44415397 | Sb06g016010.1 | PF06258 AT5G22350.1 ELM1 ELM1 (ELONGATED MITOCHONDRIA 1)                                                                                                                                                                                        |
| Diameter    | TP69676  | Chromosome_2 | 27812706 | Sb02g014480.1 | PF07719,PF00515,PF00564 PTHR22904 KOG4151 AT2G25290.1 binding                                                                                                                                                                                   |

STable 11. SNPs associated with response variables based on *TASSLE* analyses. Total number of SNPs associated = 173 (anthesis 11, height 87, canopy area 28, blade width 7, emergence 38, diameter 2). Of those SNPs that were associated in *TASSLE* and also *Bayescan* outliers, there were a total of 33 (anthesis 1, height 11, canopy area 9, blade width 0, emergence 12, and diameter 0). Only those associations with annotated SNPs are shown here. Gray shading indicates the GA1 SNP.

Markers that were associated, but not annotated: TP118569, TP19463, TP129182, TP14132, TP164302, TP19463, TP25391, TP27700, TP34353, TP47256, TP48595, TP52052, TP61449, TP62618, TP79145, TP91916, TP40577, TP53225, TP64928, TP82066, TP93930, TP106232, TP107688, TP124841, TP125449, TP126048, TP147316, TP153041, TP174440, TP177326, TP15153, TP70053, TP7498, TP106075, TP140561, TP68489, TP135366, TP169807, TP12076, TP162226, TP44305, TP100504, TP49032, TP101481, TP135939, TP123320, TP18961, TP163294, TP138332, TP143687, TP505, TP180468, TP160634, TP156386, TP151095, TP164220, TP29647, TP117156, TP97430, TP62307, TP86868, TP106592, TP100082, TP144170, TP24765, TP102312, TP113188, TP71544, TP148121, TP34326, TP131010, TP129945, TP80136, TP160911, TP125027, TP93235, TP132908, TP104813, TP114252, TP19463, TP34353, TP52052, TP62618, TP79145, TP53225, TP93930, TP169807, TP82066, TP103399, TP124841, TP135366, TP107688, TP174440, TP138332, TP147316, TP106232, TP177326, TP7498, TP106075, TP162226, TP173892, TP92195, TP104813, TP114252, TP161527, TP19463, TP34353, TP47256, TP52052, TP61449, TP62618, TP79145, TP82066, TP124841, TP177326, TP87444, TP53225, TP70053, TP68489, TP107688, TP93930, TP156386, TP174440, TP147316, TP113188, TP40577, TP44305, TP7498, TP106232, TP18961, TP160372, TP2227, TP30673, TP140561, TP97430, TP124841, TP22543, TP160634, TP174440.
